# Supplementary material for: Immunization with GP1 but Not Core-like Particles Displaying Isolated Receptor-Binding Epitopes Elicits Virus-Neutralizing Antibodies against Junín Virus
Source: MDPI journal article supplement (doi:10.3390/vaccines10020173), 2022-01-22
Supplement: s1 [file s1]

## Supplementary Materials

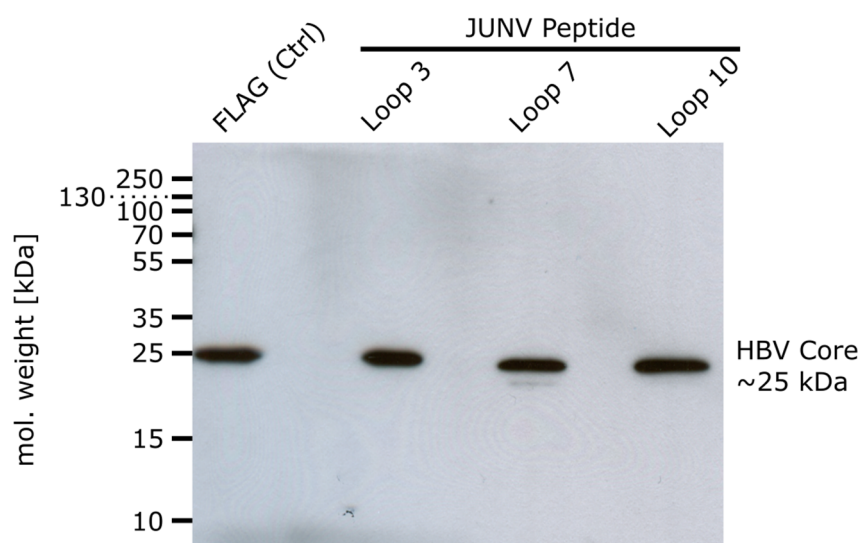

Figure S1: Western Blot

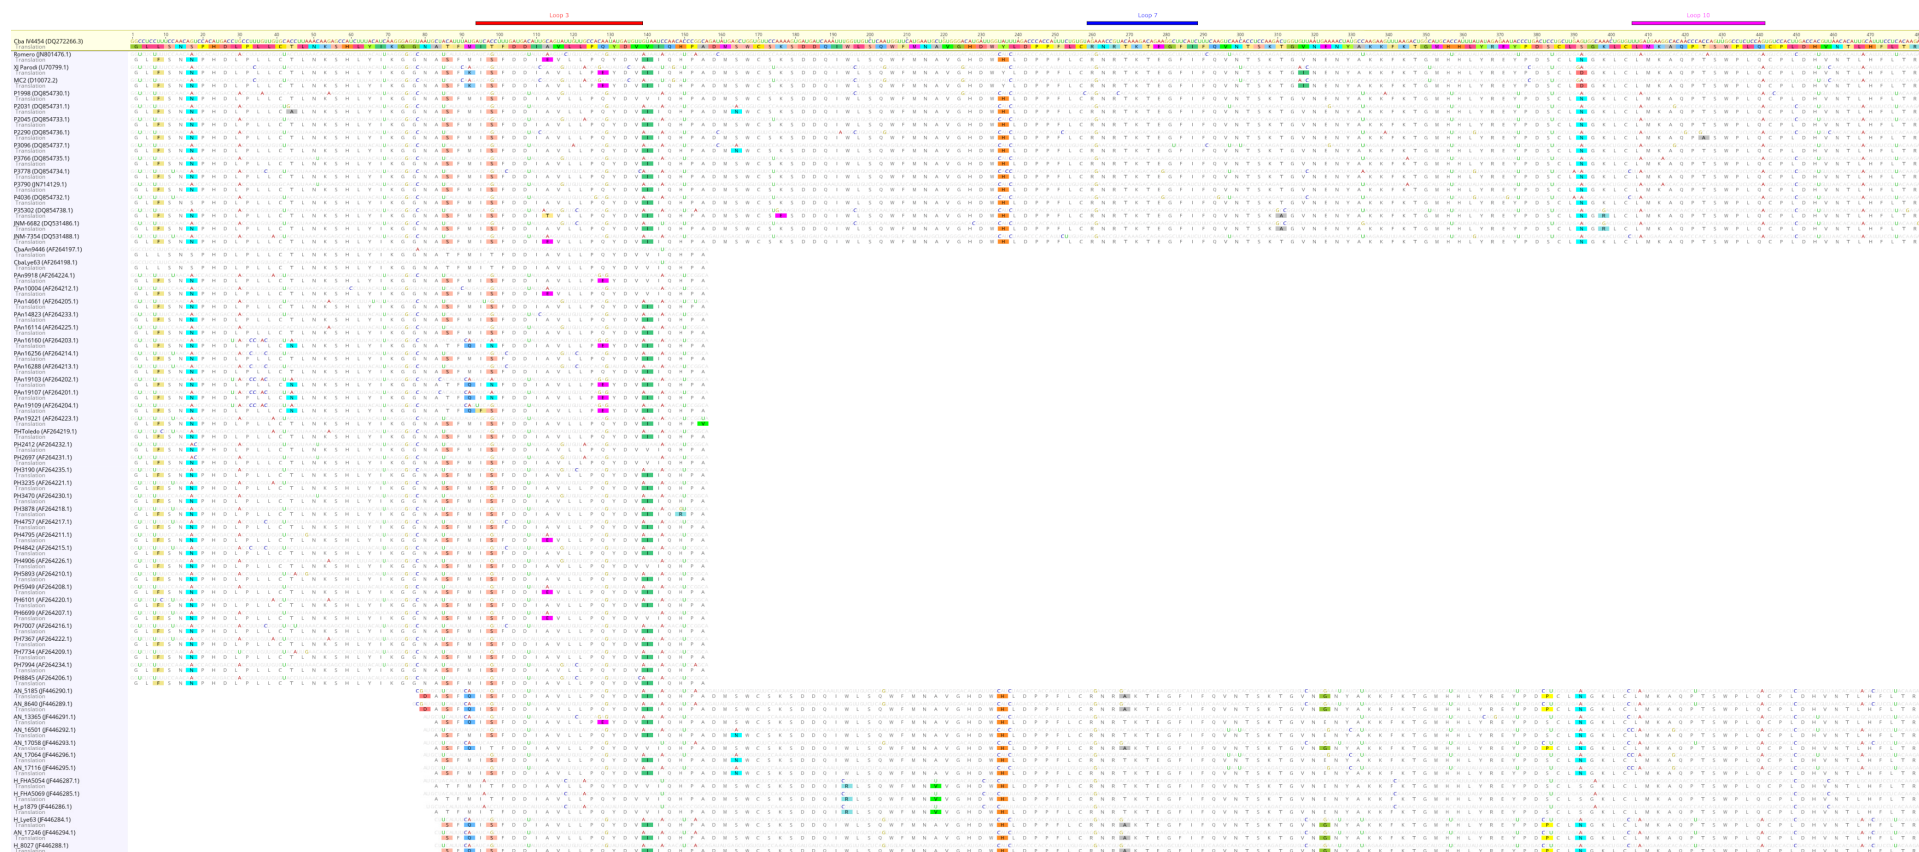

**Figure S2: Alignment of Junín virus (JUNV) sequences.** The sequences of 63 unique naturally occurring JUNV isolates available in GenBank were aligned and trimmed to show only amino acids in and around the peptide loops used for immunization in this study. The location of the sequences against which peptides were generated are shown in color (Loop 3, red; Loop 7, blue; Loop 10, magenta) above the Cba IV4454 reference sequence. Variable amino acids are highlighted in color in each sequence.

**Text S1. Sequences for expression plasmids used in this study.**

>pHL-Sec-JUNV\_GP1-Strep

[illegible]

>pHL-Sec-JUNV\_GP1-His6

4

gctaataaaggaaattattttcattgcaatagtggttgaatttttgtgtctctcactcggaaggacatatgggagggcaaatcattttaaaccatc  
agaatgagtagtttggtagagtttggcaacatatgccatatgctggctgcatgaacaaggttggctataaagaggtcatcagtatatgaaac  
agccccctgctgtccattccttattccatagaaaaagccttgacttgaggttagattttttatattttgtttgttatttttcttaacatccctaaaatt  
ttccttacatgttttactagccagatttttctcctctcctgactactcccagtcatactgtccctcttctttaggagatccctcgacctgcagcccaag  
cttggcgtaatacatggtcatagctgtttcctgtgtgaaattgttatccgctcacaattccacacaacatacgagccggaagcataaagtgtaaagcct  
ggggtgcctaataagtagtgagtaactcacattaattgcgttgcgctcactgcccgtttccagtcgggaaacctgtcgtgccagcggatcgatccgc  
tgcaataatgaatcgccaacgcgcggggagaggcgggttgcgtattggcgctcttccgcttctcgtcactgactcgtgcgtcggctggttc  
ggctgcggcgagcgggtatcagtcactcaaaaggcggtaatacgggttatccacagaatcaggggataacgcaggaaagaacatgtgagcaaaa  
ggccagcaaaaggccaggaacgtaaaaaggcgggttgcgttggcgtttttccataggtccgccccctgacgagcatcaaaaaatcgacgct  
caagtcagaggtggcgaaacccgacaggactataaagataaccaggcgtttccccctggaagctcctcgtgcgtctcctgttccgacctgccc  
cttaccggatactgtccgcttttctccttcggaagcgtggcgcttttccatagctcacgctgtaggtatctcagttcgggtgtaggtcgttcgctcc  
aagctgggctgtgtgcgaaccccccttcagcccgaccgctgcgcttatccgtaactatcgtcttgagtccaacccggtaagacacgactta  
tcgccactggcagcagccactggtaacaggattagcagagcgaggtatgtaggcgggtctacagagttcttgaagtgggtggcctaactacggct  
acactagaagaacagtagtttggtagtctgcgtctgtagcaggttaccttcggaaaaagagttggtagctcttgatccggcaaaacaccaccg  
ctggtagcgggtggttttttggcaagcagcagattacgcgcagaaaaaaggatctcaagaagatcctttagatcttttctacggggtctgacgc  
tcagtggaaacgaaaactcacgttaagggttttggtagatgattcaaaaaggatcttcacctagatccttttaattaaaaatgaagttttaa  
caatctaaagtatatagtagtaacttggctgacagttaccaatgcttaacagtgaggcacctatctcagcgtatctgtctatttctgtcatccatagt  
tgctgactccccgtcgtgtagataactacgatacgggaggggttaccatctggccccagtgctgcaatgataccgcgagaccacgctcaccgg  
ctccagatttatcagcaataaaccagccagccggaaggccgagcgcagaagtggctctgcaactttatccgctccatccagtccttaattgttg  
ccgggaagctagagtaagtagttccaggttaatagttttgcgaacgttgttgcattgctacaggcatcgtggtgtcacgctcgtcgtttggtatg  
gcttattcagctccggttccaacgatcaaggcgagttacatgatccccatgttgtgcaaaaaagcgggttagctcttccggtcctccgatcgttgt  
cagaagtaagttggccgagtggttatcactcatggttatggcagcactgcataattcttactgtcatgccatccgtaagatgcttttctgtgactgg  
tgagtactcaaccaagtcattctgagaatagtgtagtgcggcgaccgagttgctcttgcggcgtaatacgggataataccgcgccacatagca  
gaactttaaagtgtcatcattggaaaacgttctcggggcgaaaactctcaaggatcttaccgctgttgagatccagttcgatgtaaccactcgt  
gcaccaactgatcttcagcatcttttactttcaccagcgtttctgggtgagcaaaaacaggaaggcaaaatgccgcaaaaaagggaataagggc  
gacacggaaatgtgaatactcatacttcttcttttaataattattgaagcatttatcagggttatgtctcatgagcggatacatatttgaatgtattta  
gaaaaataaacaatagggttccgcgcacattccccgaaaagtgcacctgg

>pET28a-HBVc-FLAG

tggcgaatgggacgcgcctgtagcggcgcatgaagcgcggcggtgtggtggttacgcgcagcgtgaccgtacacttgccagcgccttagc  
gcccgtcctttcgtcttcttcccttcttctgcgcacgttcgcggcttccccgtcaagctctaatacgggggctccctttaggggttccgatttagtc  
tttacggcacctcgacccaaaaaacttgattagggtagtggttacgtagtgggccatcgccctgatagacgggttttccgcttttgcgttggag  
tccacgttcttataagtgactctgttccaaactggaacaacactcaacctatctcgggtctattctttgattataagggaattttccgatttccggc  
tattgggttaaaaaatgagctgatttaaaaaaatttaacgcgaatttaaaaaatataacgtttacaatttcagggtggcattttcggggaaatgtg  
cgcggaacccctattgttttttctaaatacatccaatatgtatccgctcatgaattaattcttagaaaaactcatcgagcatcaaatgaaactgc  
aatttattcatatcaggattatcaatacatattttgaaaaagccgtttctgtaataaggagaaaaactcaccgagcaggttccataggatggcaa  
gatcctggtagcgtctgcgattccgactcgtcaacatcaatacaacctattaatttccccctgtcaaaaaataagggtatcaagtgagaatcacat  
gagtgacgactgaatccggtgagaatggcaaaagtattgcatcttcttccagactgttcaacaggccagccattacgctcgtcatcaaaatcact  
cgcatcaacaaaccgttattcattcgtgattgcgctgagcgcagcaataacgcgatcgtgttaaaaggacaattacaacaggaatcgat  
gcaaccggcgaggaaactgccagcgcatacaataattttcacctgaatcaggataatttcttaataacctggaatgctgttttccggggatcgc  
agtggtagtaacctgcatcatcaggagtacggataaaatgcttgatggtcggaagaggcataaattccgtcagccagtttagtctgacatctc  
atctgtaacatcattggcaacgctacctttgcatgtttcagaacaactctggcgcatcgggctcccatacaatcgatagattgtcgacactgattg  
cccgcattatcgcgagccatttatcccatataaatcagcatccatgttggaaattaatcgcggcctagagcaagcgtttccggttgaatatggc

tcataacaccccttgattactgtttatgtaagcagacagttttattgttcatgacaaaatcccttaacgtgagtttctgtccactgagcgtcagaccc  
cgtagaaaagatcaaaggatcttcttgatcctttttctgcgcgtaatctgctgcttgcaaacaaaaaacaccgctaccagcgggtgttgtt  
gccggatcaagagctaccaactctttccgaaggttaactggcttcagcagagcgcagatacacaatactgtccttctagttagccgtagttaggc  
caccacttcaagaactctgtagcaccgcctacatacctgcctctgctaactctgttaccagtggctgctgccagtggcgataagtcgtgttaccgg  
gttggactcaagacgatagttaccggataaggcgcagcggctcgggctgaacgggggggttcgtgcacacagcccagcttgagcgaacgacct  
acaccgaactgagatacctacagcgtgagctatgagaaagcgcacgctcccgaaggagaaaggcggacaggtatccggtaagcggcag  
ggctcggaacaggagagcgcacgagggagcttcagggggaacgcctggatctttatagtcctgtcgggttcgccacctctgactgagcgt  
cgattttgtgatgctcgtcagggggggcgagcctatggaaaaacgccagcaacgcggccttttaccggttctggccttttctggcctttgtctca  
catgtttcttctgcgttatccctgattctgtggataaccgtattaccgctttgagtgcgtgataccgctcgcgcagccgaacgaccgagcgca  
gcgagtcagtgcgaggaagcgggaagagcgctgatgcgggtattttctcttacgcactgtgcgggtatttccacccgcatatatggtgcactct  
cagtacaatctgctctgatgccgcatagttaagccagtatacactccgctatcgtctacgtgactgggtcatggctgcgccccgacaccgccaaca  
cccgtgcagcgccttgacgggcttctgctcctccggcatccgcttacagacaagctgtgaccgtctccgggagctgcatgtgtcagaggttttca  
ccgtcatcaccgaaacgcgcgagggcagctgcggtaaagctcatcagcgtggctgtaagcgaattcacagatgtctgcctgttcatccgcgtccag  
ctcgttgagtttctccagaagcgttaatgtctggcttctgataaagcgggcatgttaagggcggtttttctgtttgggtcactgatcctccgtgta  
aggggggatttctgttcatgggggtaataaccgatgaacgagagaggatgctcacgatacgggttactgatgatgaacatgccgggttactg  
gaacgttgtaggggtaacaactggcggtatggatgcggcgggaccagagaaaaatcactcagggtcaatgccagcgttctgttaatacagat  
gtaggtgttccacagggtagccagcagcatcctgcgatgcagatccggaacataatgggtgcagggcgctgacttccggtttccagactttacga  
aacacggaaaccgaagaccattcatgttgtgctcaggtcgcagacgtttgcagcagcagtcgcttcacgttcgctcgcgtatcgggtgattcattct  
gtaaccagtaaggcaaccccgccagcctagccgggtctcaacgacaggagcacgatcatgcgacccgtggggccgcatgccggcgata  
atggcctgcttctcgcgaaacgtttgggtggcgggaccagtgcgaaggcttgagcagggcgctgcaagattccgaataccgcaagcgacag  
gccgatcatcgtcgcgtccagcgaagcggctctcgcgaaatgaccagagcgtgcggcacctgtctacgagttgcatgataaagaag  
acagtcataagtgcggcgacgatagtcatccccgcgccaccgggaaggagctgactgggtgaaggcttcaagggcatcggtcgatccc  
gggtcctaagtgcgtgagtaactacattaattgcgttgcgctcactgccgctttccagtcgggaaacctgtcgtgccagctgcattaatgaatcg  
gccaacgcgcggggagagggcggtttgcgtattggcgccaggggtggttttctttaccagtgagacgggcaacagctgattgccttcaccgc  
ctggccttgagagagttgcagcaagcgggtccacgctggtttgccccagcaggcgaaaatcctgtttgatggtggttaacggcgggatataacat  
gagctgtcttcgggtatcgtctatccactaccgagataccgaccaacgcgcagcccgactcggtaatggcgcgcatfctgcccagcgccat  
ctgatcgttggcaaccagcatcgcagtggaacgatgcctcattcagcatttgcatggtttgttgaacccggacatggcactccagtcgcctcc  
cgttccgctatcggtgaatttgattgcgagtgagatattatgcccagccagccagacgcagacgcgcgagacagaacttaatgggcccgttaa  
cagcgcgatttgcgtgtgacctaatgcgaccagatgctccacgcccagtcgcgtaccgtcttcatgggagaaaaataactgttgatgggtgtctg  
gtcagagacatcaagaaataacgccgaacattagtcaggcagcttcacagcaatggcatcctggtcatccagcggatagttaatgatcagc  
ccactgacgcgttgcgcgagaagattgtgcaccgcccgtttacaggcttcgacgccgttcttaccatcgacaccaccagctggcaccaggt  
tgatcggcgcgagatttaacgcgcgacaatttgcgacgcgcgtgcagggccagactggaggtggcaacccaatcagcaacgactgtttg  
cccgcagttgttgcacgcgggttgggaatgaattcagctccgcatcgcgcttccacttttcccgcgttttcgagaaacgtgggtggcctg  
gttcaccacgcgggaaacggctgataagagacaccggcatactctgcgacatcgataacgttactggtttacattcaccacctgaattgactc  
tcttccgggctatcatgccataccgcgaaagggtttgcgcatctgatggtgtccgggatctcgacgctctcccttatgcgactcctgcattagga  
agcagcccagtagtaggttagggcgttgagcaccgcccgcgcaaggatggtgcatgcaaggagatggcgcccaacagtcccccgccacg  
gggcctgccaccataccacgccgaacaagcgtcatgagcccgaagtggcgagcccgatcttcccatcggtgatgtcggcgatataaggcg  
ccagcaaccgcacctgtggcgccggtgatccggccacgatgcgtccggcgtagaggatcgagatctcgatcccgcgaaattaatacactcac  
tataggggaattgtgagcggataacaattcccctctagaaataatttgtttaactttaagaaggagataacatggccagctggtccacccccca  
gttcgagaagggcgagggtctggcgcggaagcggcgaggatcttgagccacctcagtttgagaaactcgagatggacatcgacctct  
acaaagaattcggcgccaccgtggaactgctgagcttctgccagcgaacttctccctccgtgcgggacctgctggacaccgcctctgcctgt  
acagagaggccctggaaagccccgagcactgcagccctcaccacaccgcccctgagacaggccatcctgtgtcgtggggcgagctgatgacctg  
gccacctgggtgggagtgaacctggaagatggcgggcgaggctctggcgaggcggtaccgactacaaggacgacgatgacaaaggcgg

atccggcgagggggagcgaggcgaggatctagagatctggtggtctctacgtgaacaccaacatgggcctgaagttcagacagctgc  
tgtggttccacatcagctgaccttggccgcgagacagtacgtacgtgctctcggcgtgtggatcagaacccccctgcctaca  
gaccccccaacccccctatcctgtcagcgtgcccagacaacgtggtgcgagaagaggcagaagccccagaagaagaacccccagcccc  
aggcggagaagaagccagagccctagaaggcgagatccagagccgcgagagccagtgataaaagcttttctagatgataagcgccgc  
actcgagcaccaccaccaccactgagatccggctgtaacaaagcccgaaggaagctgagttggctgctgccaccgctgagcaataacta  
gcataaccccttggggccttaaacgggtcttgaggggtttttgctgaaaggaggaactatatccggat

>pET28a-HBVc-JUNV-Loop-3

tggcgaatgggacgcgacctgtagcggcgcaatgaacgcggcggtgtggtggttacgcgcagcgtgaccgctacacttgcagcgccttagc  
gcccgtcctttcgttttcttcccttcttctgccacgttcgccggttccccgtcaagctctaatacgggggctcccttaggggtccgatttagtgc  
tttacggcacctcgaccccaaaaacttgattagggtagtggttacgtagtgggccatcgccctgatagacgggttttcgccccttgacgttggag  
tccacgttctttaatagtggaacttcttccaaactggaacaacactcaacccctatctcggtctattcttttgattataagggattttgccgatttcggcc  
tattgggttaaaaaatgagctgatttaacaaaaatttaacgcgaatttaacaaaaatattaacgtttacaatttcaggtggcacttttcgggaaatgtg  
cgcggaacccctattgtttatttttctaaatcatctcaaatatgtatccgctcatgaattaattcttagaaaaactcatcgagcatcaaatgaaactgc  
aatatttcatatcaggattatcaatacatattttgaaaaagccgtttctgtaataaggagaaaactcaccgaggcagttccatagggatggcaa  
gatcctggtagcgtctcgattccgactcgccaacatcaatacaacctaataattccccctgtaaaaaataagggtatcaagtgaagaatcacat  
gagtgcagactgaatccggtgagaatggcaaaagtatatgcatcttcttcagactgttcaacaggccagccattacgctcgatcaaaatcact  
cgcatcaaccaaaccgttattcattcgtgattgcgctgagcgagacgaatacgcgatcgctgttaaaaggacaattacaacaggaatcgaat  
gcaacggcgcgaggaacactgccagcgcatcaacaatatttccactgaatcaggatatttcttaataacctggaatgctgtttccgggggacgc  
agtggtagtaacctgcatcatcaggagtacggataaaatgctgatggtcggaagaggcataaattccgtcagccagtttagtctgacctctc  
atctgtaacatcattggcaacgctacctttgccatgttcagaacaactctggcgcatcgggctcccatacaatcgatagattgtcgacctgattg  
cccgacattatcgagcccatattataccatataaatcagcatccatgttggaatttaacgcggcctagagcaagacgtttccggtgaaatggc  
tcataacaccccttgattactgttatgtaagcagacagtttatgttcatgacaaaaatccctaacgtgagtttcttccactgagcgtcagacc  
cgtagaaaagatcaaaggatcttcttgagatcctttttctgcgcgtaactctgctgttgcaacaaaaaaccaccgctaccagcgggtggtttgtt  
gccggatcaagagctaccaactcttttccgaaggtaactggcttcagcagagcgagatacacaatactgtccttctagttagccgtagttaggc  
caccacttcaagaactctgtagcaccgctacatacctgctctgtaactctgttaccagtggctgctgccagtggcgataagtcgtgttaccgg  
gttgactcaagacgatagttaccggataaggcgagcggctcgggctgaacggggggttcgtgcacacagcccagcttgagcgaacgacct  
acaccgaactgagatacctacagcgtgagctatgaaagcgccacgcttccgaaggagaaaggcggacaggtatccggtgaagcgcgag  
ggtcggaacaggagagcgacagaggagcttccagggggaacgcctggtatctttatagtcctgctcgggtttccacctctgactgagcgt  
cgattttgtgatgctcgtcagggggcgagcctatggaaaaacgccagcaacgcggccttttacggttcctggccttttctggccttttctca  
catgttcttctcgttatccctgattctgttgataaccgtattaccgctttgagtgcgctgataccgctcgccgagccgaacgaccgagcgca  
gcgagtcagtgagcgaggaagcggaagagcgctgatcggtattttctcttacgcatctgtgcggtatttcaacccgatatagtgtgactct  
cagtacaatctgctctgatgccgatagttaagccagtatacactccgctatcgctacgtgactgggtcatggctgcgccccgaccccccaaca  
cccgtgacgcgcccgtgacgggctgtctgctccggcatccgcttacagacaagctgtgaccgtctccggagctgcatgtgtcagaggtttca  
ccgtcatcaccgaaacgcgcgaggcagctcggttaaagctcatcagcgtggtcgtgaagcgattcacagatgtctgctgttcatccgctccag  
ctcgttgagtttctcagaagcggttaattgtctggcttctgataaagcgggcatgttaaggcggttttttctgtttggtcactgatcctccgtgta  
agggggatttctgttcatgggggtaataaccgatgaacgagagaggatgctcacgatacgggttactgatgatgaacatccccggttactg  
gaacgttgtgagggtaaaactggcggtatggatgcggcgggaccagagaaaaatcactcagggtcaatgccagcgtctgttaatacagat  
gtaggtgtccacagggtagccagcagcatctgcgatgcagatccggaacataatggtgcagggcgctgacttccgctttccagactttacga  
aacacggaacccaagaccattcatgtttgtctcaggtcgcagacgttttcagcagcagtcgcttcacgttcgctcgctatcggtgattcattct  
gctaaccagtaaggcaaccccgccagcctagccgggtctcaacgacaggagcacgatcatgcgacccgtggggccgcatgccggcgata  
atggcctgcttctcgccgaaacgtttggtggcgggaccagtgcgaaggcttgagcgagggcggtgcaagattccgaataaccgcaagcgacag  
gccgatcatcgctcgctccagcgaagcggtcctcgccgaaatgaccagagcgctgcggcacctgtctacagttgcatgataaagaag

acagtcataagtgcggcgacgatagtcacgtccccgcgccaccggaaggagctgactgggtgaaggctcctcaaggcatcggtcgagatccc  
ggcgcctaagtgtgagtaacttacattaattgcgttgcgctcactgcccgctttccagtcgggaaacctgtcgtgccagctgcattaatgaatcg  
gccaacgcgcggggagaggcggtttgcgtattggcgccagggtggtttttctttccaccagtgcagcgggcaacagctgattgcccttaccgc  
ctggccctgagagagttgcagcaagcgggtccacgctgggttgcgccagcaggcgaaaatcctgtttgatgggtggttaacggcgggatataacat  
gagctgtcttcgggtatcgtcgtatccactaccgagatatccgcaccaacgcgcagcccgactcggtaatggcgcgcatcgcgccagcgccat  
ctgatcgttggcaaccagcatcgcagtggaacgatgccctcattcagcatttgcaggttgttgaacacggacatggcactccagtcgccttcc  
cgttcgctatcggctgaatttgattgcgagtgagatatattgcagccagccagacgcagacgcgcgagacagaacttaaggcccgctaa  
cagcgcgatttgcgttgacccaatgcgaccagatgtccacgcccagtcgcgtaccgtcttcatgggagaaaaataactgttgatgggtgctcgt  
gtcagagacatcaagaaataacgccggaacattagtcaggcagctccacagcaatggcatcctggtcatccagcgagatgtaatatgacagc  
ccactgacgcgttgcgcgagaagattgtgaccgcccgtttacaggcttcgacgcgcttcttaccatcgacaccaccacgctggcaccagct  
tgatcgcgcgagatttaacgcgcgacaatttgcgacggcgcggtgcagggccagactggaggtggcaacgccaatcagcaacgactgtttg  
cccgccagttgttgcacgcggttgggaatgaattcagctccgcatcgcgcttccacttttcccgcttttcgcagaaacgtggctggcctg  
gttaccacgcgggaaacggtctgataagagacaccggcactctgcgacatcgtataacgttactggtttcacattcaccacctgaattgactc  
tcttccggcgctatcatgccataaccgcaaagggtttgcgcccattcagtggtgtccgggatctcgacgctctcccttatgcgactcctgcatagga  
agcagcccagtagtaggttgagccgttgagcaccgcccgcgaaggatggtgcagagagatggcgcccaacagtcctcccgccacg  
gggctgcccataccacgccgaacaagcgtcatgagcccgaagtggcgagcccgatcttcccatcggtgatgtcggcgatataggcg  
ccagcaaccgcactgtggcgccggtgatccggccacgatcgctccggcgtagaggatcgagatctcgatcccgcaaattaatacactcac  
tatagggggaattgtgagcggataacaattcccctctagaataatttgtttaactttaagaaggagataacatggccagctggtccacccccca  
gttcgagaagggcgagggtctggcgccggaagcgcgaggagatcttgagccacctcagtttgagaaactcgagatggacatcgacctt  
acaaagaattcgcgccaccgtggaactgctgagcttctgcccagcacttcttcccctcgtgcgggacctgtgacaccgctctgcccctgt  
acagagaggccctggaaagccccgagcactgcagccctcaccacaccgcccctgagacaggccatcctgtgtggtggcgagctgatgacctg  
gccacctgggtgggagtgaacttgaagatggcgggcgaggctctggcgaggcggtaccatcaccttcgacgatatccggtgctgctgcc  
cagtacgacgtgggatccggcgaggggcgagcgaggcgaggatctagagatctggtggtgtcctacgtgaacaccaacatgggctga  
agttcagacagctgctgtggtccacatcagctgcctgaccttggcgcgagacagtgatcgagtacctggtgtcctcggcggtggtgatcagaa  
ccccctgcctacagaccccccaacgcccctatcctgtcgacgctgcccagagacaaccgtggtgcgcagaagaggcagaagccccagaagaa  
gaacccccagccccaggcgaggagaagaagccagagccctagaagcgggagatcccagagccgcgagagccagtgataaaagcttttctagat  
gataagcggccgactcgagcaccaccaccaccactgagatccggctgctaacaagcccgaaggaagctgagttggctgctgccaccg  
ctgagcaataactagcataacccttggggcctctaaacgggtcttgaggggtttttgtgaaaggaggaactatatccggat

>pET28a-HBVc-JUNV-Loop-7

tggcgaatgggacgcgcctgtagcggcgcatlaagcgcggcggtgtggtggttacgcgcagcgtgaccgctacacttgccagcgccctagc  
gcccgtcctttcgttttcttcccttcttctgccacgttcgcccgtttcccgctcaagctctaatacgggggctccctttagggttccgatttagtc  
ttacggcacctcgacccccaaaaacttgattagggtagtggttacgtagtgggccatcgccctgatagacgggttttcgccccttgacgttggag  
tccacgttcttaatagtggaactctgttccaaactggaacaacactaaccttatctcggtctattcttttgattataagggaatttgcgatttcggcc  
tattgggttaaaaaatgagctgatttaaaaaatttaacgcgaattttaaaaaatattaacgtttacaatttcaggtggcacttttcggggaatgtg  
cgcggaaccttattgttttttctaaatacattcaaatatgtatccgctcatgaattaattcttagaaaaactcatcgagcatcaaatgaaactgc  
aatttattcatatcaggattatcaatacatattttgaaaaagcgtttctgtaataaggagaaaaactcaccgaggcagttccataggatggcaa  
gatcctgggtatcggctgcgattccgactcgtccaacatcaatacaacctattaatttcccctcgtcaaaaaataagggtatcaagtgaagaaatccat  
gagtgacgactgaatccggtgagaatggcaaaagttaatgatttcttccagactgttcaacaggccagccattacgctcgtcatcaaaatcact  
cgcatcaacaaaccgttattcattcgtgattgcgcctgagcgagacgaaatacgcgatcgctgtttaaaggacaattacaacagggaatcgaat  
gcaaccggcgaggaaactgccagcgcatcaacaatatttccactgaatcaggatattcttctaatacctggaatgctgtttcccggggatcgc  
agtggtagtaacctgcatcatcaggagtacggataaaatgcttgatggtcggaagaggcataaattccgtcagccagtttagtctgacctctc  
atctgtaacatcattggcaacgctaccttggcatgttcagaacaacttggcgcatcgggctccatacaatcgatagattgtcgacactgattg



cccacattatcgcgagccattataccatataaatcagcatccatgttggaatttaacgcggcctagagcaagacgtttcccggtgaatatggc  
tcataacacccctgtattactgttatgtaagcagacagttttattgttcatgacaaaaatccctaacgtgagtttcttccactgagcgtcagacc  
cgtagaaaagatcaaaggatcttcttgagatcctttttctgcgcgtaactctgctgcttgcaaaaaaaaccaccgctaccagcgggtgttgtt  
gccggatcaagagctaccaactctttccgaaggtaactggcttcagcagagcgcagataccaaatactgtccttctagttagccgtagttaggc  
caccactcaagaactctgtagcaccgcctacatacctcgtctgctaactctgttaccagtggctgctgccagtggcgataagtcgttcttaccgg  
gttgactcaagacgatagttaccggataaggcgcagcggctgggctgaacggggggttcgtgcacacagcccagcttgagcgaacacact  
acaccgaactgagatactacagcgtgagctatgaaaagcgcacgctcccgaaggagaaaggcggacaggtatccggtaagcggcag  
ggtcggaacaggagagcgcacgagggagcttcagggggaacgcctggtatctttatagtcctgtcgggtttccacctctgactgagcgt  
cgattttgtgatctcgtcagggggcgagcctatgaaaaacgcagcaacgcggccttttacggttcctggccttttctggccttttctca  
catgttttctcgttattcccctgattctgttgataaccgtattaccgcctttgagttagctgataccgctcgcgcagccgaacaccgagcgc  
gcgagtcagttagcgggaagcgggaagagcgcctgatgcgggtattttctcttacgcactctgtcgggtatttccacccgatataatggtgcactt  
cagtacaatctgctctgatgcgcgatagttaagccagtatacactccgctatcgtactgactgggtcatggctgcgccccgacaccgccaaca  
cccgtgacgcgccctgacgggctgtctgtcccggcatccgcttacagacaagctgtgacgctcctgggagctgcatgtgtcagaggtttca  
ccgtcatcaccgaacgcgcgagggcagctgcggtaaagctcatcagcgtggctgtaagcgaattcacagatgtctgctgttcatccgcgtccag  
ctcgttgagtttctcagaagcgttaattgtctggcttctgataaagcgggcatgttaaggcggtttttctgtttgtcactgatgctccgtgta  
agggggatttctgttcatgggggtaataaccgatgaacgagagaggatgctcacgatacgggttactgatgatgaacatccccggttactg  
gaacgttgtgagggtaaacactggcggtatggatgcggcgggaccagagaaaaatcactcagggtcaatgccagcgttccgttaatacagat  
gtaggtgtccacagggtagccagcagcatctgcgatgcagatccggaacataatggtgcaggcgctgacttccgcgtttccagactttacga  
aacacggaaaccgaagaccattcatgtttgtctcaggtcgcagacgttttgacgagcagctcgttccagttcgtcgcgtatcgggtgattcattt  
gctaaccagtaaggcaaccccgccagcctagccgggtctcaacgacaggagcacgatcatgcgcacccgtggggccgcatccggcgata  
atggcctgcttctgcgaaacgtttggtggcgggaccagtgcgaaggcttgagcagggcgctgcaagattccgaataccgcaagcgcag  
gccgatcatcgtcgcgtccagcgaagcgggtctcgcggaataatgaccagagcgtcgcggcacctgtctacagattgcatgataaagaag  
acagtcataagtgcggcgacgatagtcacgtccccgcgccaccggaaggagctgactgggtgaaggcttcaaggcgatcggtcgagatccc  
gggtgcctaagtagtgagctaacttacattaattgcgttgcgctcactgccgctttccagtcgggaaacctgtcgtgcagctgcattaatgaatcg  
gccaacgcgcggggagaggcggtttgcgtattggcgccagggtggttttcttttaccagtgagacgggcaacagctgattgccttccaccg  
ctggccctgagagagttgcagcaagcgggtccacgtggtttgccccagcaggcgaaaaatcctgttgatggtggttaacggcgggatataacat  
gagctgtcttcggatcgtcgtatcccactaccgagataccgcaccaacgcgcagcccgactcggtaatggcgcgattgcgccagcgccat  
ctgatcgttggcaaccagcatcgcagtggaacgatgccctcattcagcatttgcattggtttgtgaaaaccggacatggcactccagtcgccttc  
cgttccgctatcggctgaatttgattgcgagtgagataattatgcagccagccagacgcagcgcggagacagaacttaattggggccgctaa  
cagcgcgatttgcgttgacccaatgcgaccagatgtccacgccagtcgcgtaccgttctcatgggagaaaaataactgttgatgggtgtctg  
gtcagagacatcaagaaataacgccggaacattagtgcaggcagcttcacagcaatggcatcctggtcatccagcggatagttaatgatcagc  
ccactgacgcgttgcgcgagaagattgtgcaccgcgctttacaggcttcgacgcgcttcttaccatcgacaccaccacgctggcaccagat  
tgatcggcgagatttaacgcgcgacaatttgcgacggcgctgcaggcgccagactggaggtggcaacgccaatcagcaacgactgtttg  
cccgccagttgttgcacgcgggttggaatgaattcagctcgcgcatcgcgcttccacttttcccgcttttcgagaaacgtggctggcctg  
gttaccacgcgggaaacgggtctgataagagacaccggcatactctgcgacatcgtataacgttactgggtttcacattcaccacctgaattgactc  
tcttccggcgctatcatgccataccgcgaagggttttgcgccattcagtggtgtccgggatctcgacgctctcccttatgcgactcctgattagga  
agcagcccagtagtaggttgaggccgttgagcaccgcgcgcaaggaaatggtgatgaaggagatggcgcccaacagctccccggccacg  
gggctgccaccataccacgcgaaacaagcgtcatgagcccgaagtggcgagcccgatctcccatcggtgatgtcggcgatataaggcg  
ccagcaaccgcacctgtggcgccggtgatccggccacgatgcgtccggcgttagaggatcgagatctcgatcccgcaaatataacgactcac  
tataggggaattgtgagcggataacaattccccttagaaataatttgtttaaactttaagaaggagatataacatggccagctggtccccccca  
gttcgagaaggcgagggtctggcgcggaagcggcgaggatcttgagccacctcagtttgagaaactcgagatggacatcgacctt  
acaaagaattcggcgccaccttggaactgctgagcttctgccagcgaacttctccctccgtgcgggacctgtcggacaccgcctctgcctgt  
acagagaggccctggaagccccgagcactgcagccctcaccacaccgccttgagacaggccatcctgtctggggcgagctgatgacctg

gccacctgggtgggagtgaaacctggaagatggcggcgaggctctggcggaggcggtacctggaaccggaccaagaccgagggattcatt  
ggatccggcgaggggggcagcggagcgaggatctagagatctgggtgtctacgtgaaccaacatgggctgaagttcagacagc  
tgctgtggttccacatcagctgcctgaccttggccgcgagacagtgcagtagctacgtgtccttcggcgtgtggatcagaacccccctgccta  
cagaccccccaacgccctatctgtcgacgtgccgagacaacctgggtgcgcagaagaggcagaagccccagaagaagaacccccagcc  
ccaggcggagaagaagccagagccctagaaggcgagatcccagagccgcgagagccagtataaaagcttttctagatgataagcggcc  
gcactcgagcaccaccaccaccactgagatccggctgtaacaaagcccgaaggaagctgagttggctgtgccaccgctgagcaataa  
ctagcataaccccttggggcctctaaacgggtcttgaggggttttctgtaaaggaggaaactatatccggat

>pET28a-HBVc-JUNV-Loop-10

tggcgaatgggacgcgcctgtagcggcgcatgaagcgcggcggtgtgtgtgttacgcgcagcgtgaccgtacacttgccagcgccttagc  
gcccgtcctttcgtcttcttcccttcttctcgccacgttcgcgggttccccgtcaagcttaaatcgggggctccctttagggttccgatttagtc  
tttacggcacctcgacccaaaaaacttgattagggtagtggtcacgtagtggccatcgccctgatagacggttttcgcctttgacgttggag  
tccacgttcttaatagtgactctgttccaaactggaacaacactcaacctatctcggtctattctttgattataagggttttgcgatttcggcc  
tattggttaaaaaatgagctgatttaaaaaatttaacgcgaatttaacaaaatattaacgtttacaatttcaggtggcactttcggggaaatgtg  
cgcggaacccctattgttttttctaaatacttcaaatatgtatccgctcatgaattaattcttagaaaaactcatcgagcatcaaatgaaactgc  
aatattcatatcaggattatcaataccatattttgaaaaagcgttctgtaataaggagaaaactcaccgaggcagttccataggatggcaa  
gatcctgggtatcggtctgcgattccgactcgtcaacatcaatacaacctattaatttcccctcgtaaaaaataagggtatcaagtgaagaatcacat  
gagtgacgactgaatccggtgagaatggcaaaagtattgcatcttctccagactgttcaacaggccagccattacgctcgtcatcaaaactact  
cgcatcaacaaaccgttattcattcgtgattgcgctgagcgcagacgaatacgcgcatcgtgttaaaaggacaattacaacagggaatcgaat  
gcaaccggcgaggaacactgccagcgcatacaaatatttccacgtaatcaggatattcttctaatacctggaatgctgtttccgggggatcgc  
agtggtagtaacctgcatcatcaggagtagcgataaaatgcttgatggtcggaaggagcataaattccgtcagccagtttagtctgacctctc  
atctgtaacatcattggcaacgctacctttgcatgtttcagaacaactcggcgcatcgggttccatacaatcgatagattgtcgacctgattg  
cccgacattatcgcgagcccatttataccatataaatcagcatcatgttggaatttaacgcggcctagagcaagacgtttcccggtgaatatggc  
tcataacacccctgtattactgtttatgtaagcagacagttttattgttcatgacaaaaatcccttaacgtgagtttcttccactgagcgtcagacc  
cgtagaaaagatcaaaggatcttcttgagatcctttttctgcgcgtaactcgtcgttgcacaaaaaaaaccaccgctaccagcgggtgtgttt  
gcccgatcaagagctaccaactcttttccgaaggtaactggcttcagcagagcgcagatacaaaatactgtccttctagttagccgtagttaggc  
caccacttcaagaactctgtagcaccgcctacatacctcgtctgtaactcgtttaccagtggctgctgcagtggtgataagtcgtgtcttaccgg  
gttgactcaagacgatagttaccggataaggcgagcggtcgggtgaacggggggttcgtgcacacagcccagcttgagcgaaacgacct  
acaccgaactgagatacctacagcgtgagctatgagaagcgccacgcttccgaaggagaaaggcggacaggtatccggtgaagcggcag  
ggtcggaacaggagagcgcagaggagcttccagggggaacgcctggtatctttatagtcctgtcgggtttccacacctgacttgagcgt  
cgattttgtgatgctcgtcagggggggcgagcctatgaaaaacgcagcaacgcggccttttaccggttctggccttttctggccttttctca  
catgttcttctcgtttatccctgattctgttgataaccgtattaccgctttgagtgagctgataccgctcgcgcagccgaacgaccgagcgca  
gcgagtcagtgagcgaggaagcgggaagagcgctgatcggtattttctcttacgcatctgtgcggtatttcaaccgcataatggtgactct  
cagtacaatctgctctgatgcgcgatagttaagccagtatacactccgctatcgtctacgtgactgggtcatggctgcgccccgacaccgccaaca  
cccgtgacgcgcctgacgggctgtctgtctccggcatccgcttacagacaagctgtgaccgtctccgggagctgcatgtgtcagagggtttca  
ccgtcatcaccgaaacgcgcgaggcagctgcggtaaagctcatcagcgtggtcgtgaagcgattcacagatgtctgcctgttcatccgcgtccag  
ctcgttgagtttccagaagcgttaattgtctggttctgataaagcgggcatgttaagggcggttttctgttttggtcactgatgctccgtgta  
agggggatttctgttcatgggggtaatgataccgatgaacgagagaggatgctcacgatacgggttactgatgatgaacatgccgggttactg  
gaacgttgtgagggtaacaactggcggtatggatgcggcgggaccagagaaaaatcactcagggtcaatgccagcgcttcgttaatacagat  
gtaggtgttccagggtagccagcagcatctcgatgcagatccggaacataatgggtgcagggcgctgacttccgcgtttccagactttacga  
aacacggaacccaagaccattcatgtttgtcaggtcgcagacgtttgcagcagcagtcgcttcacgttcgctcgcgtatcggtgattcattct  
gtaaccagtaaggcaaccccgccagcctagccgggtctcaacgacaggagcacgatcatgcgcacccgtggggccgcatgccggcgata  
atggcctgcttctgcggaacgtttggtggcgggaccagtgacgaaggcttgagcgaggcggtgcaagattccgaataccgcaagcgacag

gccgatcatcgtcgcgtccagcgaaagcggctcctgccgaaaatgaccagagcgtgccggcacctgtcctacgagttgcatgataaagaag  
acagtcataagtgcggcgacgatatgcatgccccgcgccaccggaaggagctgactgggtgaaggcttcaagggcatcggtcgatccc  
ggtgcctaagtgtgagtaacttacattaattgcgttgcgtcactgccgctttccagtcgggaaacctgtcgtgccagctgcattaatgaatcg  
gccaacgcgcggggagaggcgggttgcgtattggcgccagggtgggttttctttccaccagtgcgacgggcaacagctgattgccttcaccgc  
ctggccctgagagagttgcagcaagcgggtccacgtcgtttgccccagcaggcgaaaatcctgtttgatgggtggttaacggcgggatataacat  
gagctgtcttcggtatcgtcgtatccactaccgagatatccgcaccaacgcgcagcccggactcggtaatggcgcgacttgcgccagcgccat  
ctgatcgttggcaaccagcatcgagtggaacgatgcctcattcagcatttgcaggttgttgaacggacatggcactccagtcgccttc  
cgttcgctatcggtgaattgattgcgagtgagatatattatgccagccagccagacgcagcgccgagacagaacttaatgggccgctaa  
cagcgcgatttgcgttgacccaatgcgaccagatgtccacgccagtcgcgtaccgttctatgggagaaaataatactgttgatgggtgtctg  
gtcagagacatcaagaaataacccggaacattagtgcaggcagcttcacagcaatggcatcctggtcatccagcggatagttaatgatcagc  
ccactgacgcgttgcgcgagaagattgtgaccgcgctttacaggcttcgacgcgcttcgttctaccatcgacaccaccacgctggcaccagt  
tgatcgcgcgagatttaacgcgcgcacaatttgcgacggcgcggtgcagggccagactggaggtggcaacgccaatcagcaacgactgtttg  
cccgccagttgttgcacgcggttgggaatgtaattcagctccgccatcgccgcttcacttttcccgcgttttcgagaaactggctggcctg  
gttcaccacgcgggaaacggctgataagagacaccggcatactctgcgacatcgataacgttactgggttcacattcaccacctgaattgactc  
tcttcggggcgctatcatgccataaccggaaggtttgcgccattcgatgggtgtccgggatctgcagctctcccttatcgactcctgcattagga  
agcagcccagtagtaggttagggcgttagcaccgcgcccgaaggatggtgcatgcaaggagatggcgcccaacagtcccccggccacg  
gggctgccaccataccacgccgaacaagcgtcatgagcccgaagtggcgagcccgatcttcccatcggtgatgtcggcgatataggcg  
ccagcaaccgcacgtgtggcgccggtgatccggccacgatgcgtccggcgtagaggatcgagatctgatcccgcaaattaatacactcac  
tataggggaattgtgagcggataacaattcccctctagaaataatttgtttaactttaagaaggagatataacatggccagctggtccaccccc  
gttcgagaagggcgagggtctggcgcggaagcggcgaggatcttgagccaccctcagtttgagaaactcgagatggacatcgaccct  
acaaagaattcggcgccaccgtggaactgctgagcttctgccagcgaacttctcccctccgtgcgggacctgctggacaccgcctctgcctgt  
acagagaggccctggaaagccccgagcactgcagccctcaccacaccgcctgagacaggccatcctgtgtctggggcgagctgatgacctg  
gccacctgggtgggagtgaaactggaagatggcgggcgaggctctggcgaggcggtaccctgatgaaggccagcctacctctggcctct  
gcagggatccggcgaggggggcagcggaggcgaggatctagagatctggtggtgtcctacgtgaacaccaacatgggcctgaagttcaga  
cagctgtgtgttccacatcagctgcctgaccttggccgcgagacagtgatcgagtacctgggtgtccttcggcggttggatcagaacccccct  
gcctacagaccccccaacgcccctatcctgtcgacgtgcccagacaaccgtggtgcgcagaagaggcagaagccccagaagaagaacccc  
cagccccaggcggaagaagccagagccctagaaggcgagatcccagagccgcgagagccagtataaaagcttttctagatgataagc  
ggcgcgactcgagcaccaccaccaccactgagatccggctgtaacaaagccgaaaggaagctgagttggctgtgccaccgctgagca  
ataactagcataacccctggggcctctaaacgggtcttgagggtttttgctgaaaggaggaaactataatccggat
